# Supplementary material for: Dairy Consumption and Risk of Stroke: A Systematic Review and Updated Dose–Response Meta‐Analysis of Prospective Cohort Studies
Source: PubMed Central journal article supplement — J Am Heart Assoc. 2016 May 20;5(5):e002787. doi: 10.1161/JAHA.115.002787 (PMC4889169; doi:10.1161/jaha.115.002787), 2016-05-20
Supplement: JAH3-5-e002787-s001.pdf [file JAH3-5-e002787-s001.pdf]

## **SUPPLEMENTAL MATERIAL**

### **CONTENT**

#### Supplemental methods

- Supplement I. MOOSE Checklist
- Supplement II. Search strategy
- Supplement III. Quality assessment of cohort studies on dairy intake and stroke risk.
- Supplement IV: Definition of dairy foods as described in the individual cohort studies included in the meta-analyses

## Supplement I MOOSE checklist<sup>1</sup>

|                                                                                                                 | Reported on page | Comments |
|-----------------------------------------------------------------------------------------------------------------|------------------|----------|
| <b>Reporting of background should include</b>                                                                   |                  |          |
| Problem definition                                                                                              | 3                |          |
| Hypothesis statement                                                                                            | 3                |          |
| Description of study outcome(s)                                                                                 | 3                |          |
| Type of exposure or intervention used                                                                           | 3                |          |
| Type of study designs used                                                                                      | 3                |          |
| Study population                                                                                                | 3                |          |
| <b>Reporting of search strategy should include</b>                                                              |                  |          |
| Qualifications of searchers (e.g. librarians and investigators)                                                 | 4                |          |
| Search strategy, including time period used in the synthesis and key words                                      | 4, Supplement II |          |
| Effort to include all available studies, including contact with authors                                         | 4                |          |
| Databases and registries searched                                                                               | 4                |          |
| Search software used, name and version, including special features used (e.g. explosion)                        | 4                |          |
| Use of hand searching (e.g. reference lists of obtained articles)                                               | 4                |          |
| List of citations located and those excluded, including justification                                           | 4                |          |
| Method of addressing articles published in languages other than English                                         | 4                |          |
| Method of handling abstracts and unpublished studies                                                            | 4                |          |
| Description of any contact with authors                                                                         | 4                |          |
| <b>Reporting of methods should include</b>                                                                      |                  |          |
| Description of relevance or appropriateness of studies assembled for assessing the hypothesis to be tested      | 4                |          |
| Rationale for the selection and coding of data (e.g. sound clinical principles or convenience)                  | 4                |          |
| Documentation of how data were classified and coded (e.g. multiple raters, blinding and interrater reliability) | 4                |          |
| Assessment of confounding (e.g. comparability of cases and controls in studies where appropriate)               | 4                |          |
| Assessment of study quality, including blinding of                                                              | 5                |          |

|                                                                                                                                                                                                                                                                               |                     |                            |
|-------------------------------------------------------------------------------------------------------------------------------------------------------------------------------------------------------------------------------------------------------------------------------|---------------------|----------------------------|
| quality assessors, stratification or regression on possible predictors of study results                                                                                                                                                                                       |                     |                            |
| Assessment of heterogeneity                                                                                                                                                                                                                                                   | 6                   |                            |
| Description of statistical methods (e.g. complete description of fixed or random effects models, justification of whether the chosen models account for predictors of study results, dose-response models, or cumulative meta-analysis) in sufficient detail to be replicated | 5-6                 |                            |
| Provision of appropriate tables and graphics                                                                                                                                                                                                                                  | Supplementary files |                            |
| <b>Reporting of results should include</b>                                                                                                                                                                                                                                    |                     |                            |
| Graphic summarizing individual study estimates and overall estimate                                                                                                                                                                                                           | 27-53               |                            |
| Table giving descriptive information for each study included                                                                                                                                                                                                                  | 17-22               |                            |
| Results of sensitivity testing (e.g. subgroup analysis)                                                                                                                                                                                                                       | 7-9                 |                            |
| Indication of statistical uncertainty of findings                                                                                                                                                                                                                             | 7-9                 | By CI's and I <sup>2</sup> |
| <b>Reporting of discussion should include</b>                                                                                                                                                                                                                                 |                     |                            |
| Quantitative assessment of bias (e.g. publication bias)                                                                                                                                                                                                                       | 8, Fig 4-5          |                            |
| Justification for exclusion (e.g. exclusion of non-English language citations)                                                                                                                                                                                                | Na                  |                            |
| Assessment of quality of included studies                                                                                                                                                                                                                                     | 10                  |                            |
| <b>Reporting of conclusions should include</b>                                                                                                                                                                                                                                |                     |                            |
| Consideration of alternative explanations for observed results                                                                                                                                                                                                                | 10                  |                            |
| Generalization of the conclusions (i.e. appropriate for the data presented and within the domain of the literature review)                                                                                                                                                    | 11                  |                            |
| Guidelines for future research                                                                                                                                                                                                                                                | 12                  |                            |
| Disclosure of funding source                                                                                                                                                                                                                                                  | 13                  |                            |

## Supplement II Search strategy (Pubmed) – updated until June 2015

EMBASE (<http://www.embase.com>) and SCOPUS (<http://www.scopus.com>) search strategies were based on the Pubmed (<http://www.ncbi.nlm.nih.gov/pubmed>) query syntax shown below.

### ACTION 1 DETERMINANTS

#1 dairy products[Mesh] OR milk[Mesh] OR cheese[Mesh] OR yogurt[Mesh] OR butter[Mesh] OR cultured milk products[Mesh] OR ice cream[Mesh]

#2 dairy[tiab] OR milk\*[tiab] OR cheese\*[tiab] OR yogurt\*[tiab] OR yoghurt\*[tiab] OR butter[tiab] OR buttermilk[tiab] OR custard\*[tiab] OR pudding\*[tiab] OR cream\*[tiab] OR cream[tiab] OR ice cream[tiab] OR ice-cream[tiab] OR curd\*[tiab] OR porridge[tiab]

#3 (#1 OR #2)

### ACTION 2 OUTCOME

#4 mortality[tiab] OR death\*[tiab] OR dead[tiab] OR all-cause[tiab] OR all cause[tiab] OR fatal[tiab] OR event[tiab] OR nonfatal[tiab] OR non-fatal[tiab] OR Mortality[Mesh:NoExp] OR mortality[Mesh subheading]

#5 cardiovascular[tiab] OR vascular[tiab] OR CVD[tiab] OR Cardiovascular Diseases[Mesh:NoExp]

#6 cerebrovascular[tiab] OR stroke[tiab] OR TIA[tiab] OR transient ischemic\*[tiab] OR CVA[tiab] OR cerebral infarction[tiab] OR Cerebrovascular accident[Mesh:NoExp] OR stroke[Mesh:NoExp]

#7 #4 OR #5 OR #6

### ACTION 3 COMBINE EXPOSURE AND OUTCOME

#8 #3 AND #7

### ACTION 4 LIMITS

#9 ((animals[MeSH] NOT (humans[MeSH] AND animals[MeSH])))

#10 #8 NOT #9

#11 breast [tiab]

#12 #10 NOT #11

1 Supplement III. Quality assessment of cohort studies on dairy intake and risk of stroke

|                                            | Selection                                |                                     |                           |                                       | Comparability | Outcome                                                         |                       |                                             | Total score |
|--------------------------------------------|------------------------------------------|-------------------------------------|---------------------------|---------------------------------------|---------------|-----------------------------------------------------------------|-----------------------|---------------------------------------------|-------------|
|                                            | Representativeness of the exposed cohort | Selection of the non-exposed cohort | Ascertainment of exposure | Outcome not present at start of study |               | Comparability of cohorts on the basis of the design or analysis | Assessment of outcome | Follow up long enough for outcomes to occur |             |
| Bernstein et al., 2012 - HPFS <sup>2</sup> | C                                        | A★                                  | C                         | A★                                    | A★B★          | B★                                                              | A★                    | B★                                          | 7           |
| Bernstein et al., 2012 - NHS <sup>2</sup>  | C                                        | A★                                  | C                         | A★                                    | A★B★          | B★                                                              | A★                    | B★                                          | 7           |
| Dalmeijer et al., 2013 <sup>3</sup>        | A★                                       | A★                                  | B★                        | A★                                    | A★B★          | B★                                                              | A★                    | B★                                          | 9           |
| Elwood et al., 2004 <sup>4</sup>           | A★                                       | A★                                  | C                         | A★                                    | A★            | B★                                                              | A★                    | B★                                          | 7           |
| Goldbohm et al., 2011 <sup>5</sup>         | A★                                       | A★                                  | B★                        | A★                                    | A★B★          | B★                                                              | A★                    | B★                                          | 9           |
| Iso et al., 1999 <sup>6</sup>              | C                                        | A★                                  | B★                        | A★                                    | A★            | B★                                                              | A★                    | B★                                          | 7           |
| Kinjo et al., 1999 <sup>7</sup>            | A★                                       | A★                                  | C                         | A★                                    | .             | B★                                                              | A★                    | D                                           | 5           |
| Kondo et al., 2013 <sup>8</sup>            | A★                                       | A★                                  | B★                        | A★                                    | A★            | B★                                                              | A★                    | B★                                          | 8           |

|                                     | Selection                                |                                     |                           |                                       | Comparability                                                   | Outcome               |                                             |                                  |             |
|-------------------------------------|------------------------------------------|-------------------------------------|---------------------------|---------------------------------------|-----------------------------------------------------------------|-----------------------|---------------------------------------------|----------------------------------|-------------|
|                                     | Representativeness of the exposed cohort | Selection of the non-exposed cohort | Ascertainment of exposure | Outcome not present at start of study | Comparability of cohorts on the basis of the design or analysis | Assessment of outcome | Follow up long enough for outcomes to occur | Adequacy of follow-up of cohorts | Total score |
| Larsson et al., 2009 <sup>9</sup>   | C                                        | A★                                  | B★                        | A★                                    | A★B★                                                            | B★                    | A★                                          | D                                | 7           |
| Larsson et al., 2012 <sup>10</sup>  | A★                                       | A★                                  | B★                        | A★                                    | A★B★                                                            | B★                    | A★                                          | B★                               | 9           |
| Lin 2013 et al., 2013 <sup>11</sup> | A★                                       | A★                                  | C                         | A★                                    | .                                                               | A★                    | A★                                          | A★                               | 6           |
| Louie al., 2013 <sup>12</sup>       | B★                                       | A★                                  | B★                        | A★                                    | A★                                                              | B★                    | A★                                          | A★                               | 8           |
| Misirli et al., 2012 <sup>13</sup>  | A★                                       | A★                                  | C                         | A★                                    | A★                                                              | B★                    | A★                                          | D                                | 6           |
| Ness et al., 2001 <sup>14</sup>     | C                                        | A★                                  | D                         | A★                                    | .                                                               | C                     | A★                                          | D                                | 3           |
| Pan et al., unpublished             | C                                        | A★                                  | C                         | A★                                    | A★B★                                                            | B★                    | A★                                          | B★                               | 7           |
| Praagman et al., 2015 <sup>15</sup> | A★                                       | A★                                  | B★                        | A★                                    | A★B★                                                            | A★                    | A★                                          | D                                | 8           |
| Sauvaget et al., 2003 <sup>16</sup> | A★                                       | A★                                  | C                         | A★                                    | .                                                               | B★                    | A★                                          | B★                               | 6           |

|                                      | Selection                                |                                     |                           |                                       | Comparability                                                   | Outcome               |                                             |                                  |             |
|--------------------------------------|------------------------------------------|-------------------------------------|---------------------------|---------------------------------------|-----------------------------------------------------------------|-----------------------|---------------------------------------------|----------------------------------|-------------|
|                                      | Representativeness of the exposed cohort | Selection of the non-exposed cohort | Ascertainment of exposure | Outcome not present at start of study | Comparability of cohorts on the basis of the design or analysis | Assessment of outcome | Follow up long enough for outcomes to occur | Adequacy of follow-up of cohorts | Total score |
| Sonestedt et al., 2011 <sup>17</sup> | B★                                       | A★                                  | A★                        | A★                                    | A★B★                                                            | A★                    | A★                                          | A★                               | 9           |
| Yaemsiri et al., 2012 <sup>18</sup>  | B★                                       | A★                                  | C                         | A★                                    | A★B★                                                            | B★                    | A★                                          | C                                | 7           |

## NEWCASTLE – OTTAWA QUALITY ASSESSMENT SCALE COHORT STUDIES

Note: A study can be awarded a maximum of one star for each numbered item within the Selection and Outcome categories. A maximum of two stars can be given for Comparability

### **Selection**

#### 1) Representativeness of the exposed cohort

- a) truly representative of the average *healthy adults* in the community ★
- b) somewhat representative of the average *healthy adults* in the community ★
- c) selected group of users *e.g. nurses, volunteers, smokers*
- d) no description of the derivation of the cohort

#### 2) Selection of the non-exposed cohort

- a) drawn from the same community as the exposed cohort ★
- b) drawn from a different source
- c) no description of the derivation of the non-exposed cohort

#### 3) Ascertainment of exposure

- a) secure record (*e.g. 7 day food diary*) ★
- b) structured interview/ $\geq 2$  *dietary recalls/diet history/ food frequency questionnaire validated for dairy or calcium* ★
- c) written self-report (*e.g. <2 dietary recalls/non-validated food frequency questionnaire or not reported whether food frequency questionnaire was validated for dairy*)
- d) no description

#### 4) Demonstration that outcome of interest was not present at start of study

- a) yes ★
- b) no

### **Comparability**

#### 1) Comparability of cohorts on the basis of the design or analysis

- a) study controls for *age, sex, body mass index, smoking, and total energy intake* ★
- b) study controls for any additional factor (*e.g. physical activity, dietary factors*) ★

### **Outcome**

#### 1) Assessment of outcome

- a) independent blind assessment/*Complete medical information available* ★
- b) record linkage/*Medical records or validated self-report* ★
- c) non-validated self-report
- d) no description

#### 2) Was follow-up long enough for outcomes to occur



a) yes ★

b) no

3) Adequacy of follow up of cohorts

a) complete follow up - all subjects accounted for ★

b) subjects lost to follow up unlikely to introduce bias - small number lost  $\leq 20\%$  follow up, or description provided of those lost ★

c) follow up rate  $< 80\%$  or no description of those lost

d) no statement

## Supplement IV

### Definition of dairy products as described in the papers of 18 prospective cohort studies included in the meta-analyses (in alphabetical order)

| Exposure category original paper   | Exposure category meta-analysis | Detailed description if available                                                                                                                                      |
|------------------------------------|---------------------------------|------------------------------------------------------------------------------------------------------------------------------------------------------------------------|
| <i>Bernstein 2011</i> <sup>2</sup> |                                 |                                                                                                                                                                        |
| Whole fat dairy                    | High-fat dairy                  | whole milk, ice cream, hard cheese, full fat cheese, cream, sour cream, cream cheese, butter                                                                           |
| Low-fat dairy                      | Low-fat dairy                   | skim/low-fat milk, 1% and 2% milk, yogurt, cottage and ricotta cheeses, low-fat cheese, sherbet                                                                        |
| <i>Dalmeijer 2013</i> <sup>3</sup> |                                 |                                                                                                                                                                        |
| Total dairy                        | Total dairy                     | All dairy food products, except butter and ice-cream                                                                                                                   |
| Milk and milk products             | Milk                            | All kinds of milk, yogurt, coffee creamers, curd, pudding, porridge, custard, and whipping cream                                                                       |
| Fermented dairy                    | Fermented dairy                 | Buttermilk, yogurt, cheese                                                                                                                                             |
| Cheese                             | Cheese                          | All types of cheese, except for curd                                                                                                                                   |
| High-fat dairy                     | High-fat dairy                  | Milk and milk products with a fat content $\geq 2\text{g}/100\text{g}$ (whole milk products) or cheese products with a fat content $\geq 20\text{g}/100\text{g}$ .     |
| Low-fat dairy                      | Low-fat dairy                   | Milk and milk products with a fat content $< 2\text{g}/100\text{g}$ (skimmed or semi-skimmed milk products), or cheese with a fat content $< 20\text{g}/100\text{g}$ . |
| <i>Elwood 2004</i> <sup>4</sup>    |                                 |                                                                                                                                                                        |
| Milk                               | Milk                            | Liquid milk, not milk used in food preparation                                                                                                                         |
| <i>Goldbohm 2011</i> <sup>5</sup>  |                                 |                                                                                                                                                                        |
| Milk products                      | Milk                            |                                                                                                                                                                        |
| Non-fermented full-fat milk        | High-fat milk                   | Whole milk (3.7% fat), cream (36%, 20% fat), condense whole milk, whole-milk cocoa, pudding, ice cream                                                                 |
| Non-fermented low-fat milk         | Low-fat milk                    | Low-fat milk (1.5% fat), skim milk (0.1% fat, condensed low-fat milk, low-fat and skim cocoa                                                                           |
| Fermented full-fat milk            | -                               | Yogurt (3.5% fat, full-fat quark (fresh cheese), sour cream                                                                                                            |
| Fermented low-fat milk             | Fermented dairy*                | Buttermilk, skim yogurt (0.1% fat) nonfat quark (fresh cheese)                                                                                                         |
| Cheese                             | Cheese                          |                                                                                                                                                                        |
| Fat cheese                         | -                               | Not further defined                                                                                                                                                    |
| Low-fat cheese                     | -                               | Not further defined                                                                                                                                                    |
| Butter                             | Butter                          |                                                                                                                                                                        |
| Low-fat dairy                      | Low-fat dairy                   |                                                                                                                                                                        |

|                                                  |                  |                                                                                                                                                                                                                                                                                       |
|--------------------------------------------------|------------------|---------------------------------------------------------------------------------------------------------------------------------------------------------------------------------------------------------------------------------------------------------------------------------------|
| <i>Iso 1999<sup>6</sup></i>                      |                  |                                                                                                                                                                                                                                                                                       |
| Milk                                             | Milk             | Not further defined                                                                                                                                                                                                                                                                   |
| Low-fat milk                                     | Low-fat milk     | Not further defined                                                                                                                                                                                                                                                                   |
| Whole-fat milk                                   | High-fat milk    | Not further defined                                                                                                                                                                                                                                                                   |
| Yogurt                                           | Yogurt           | Not further defined                                                                                                                                                                                                                                                                   |
| Cheese                                           | Cheese           | Not further defined                                                                                                                                                                                                                                                                   |
| <i>Kinjo 1999<sup>7</sup></i>                    |                  |                                                                                                                                                                                                                                                                                       |
| Dairy milk                                       | Milk             | Not further defined                                                                                                                                                                                                                                                                   |
| <i>Kondo 2013<sup>8</sup></i>                    |                  |                                                                                                                                                                                                                                                                                       |
| Milk and dairy products                          | Milk             | Authors reported that 93% comprises milk                                                                                                                                                                                                                                              |
| <i>Larsson 2009<sup>9</sup></i>                  |                  |                                                                                                                                                                                                                                                                                       |
| Total dairy                                      | Total dairy      | Low-fat milk, whole milk, yogurt, cheese, cream, ice-cream, butter (dairy from mixed dishes included)                                                                                                                                                                                 |
| Low-fat milk                                     | Low-fat milk     | Not further defined                                                                                                                                                                                                                                                                   |
| Whole milk                                       | High-fat milk    | Not further defined                                                                                                                                                                                                                                                                   |
| Total milk (additionally provided by the author) | Milk             |                                                                                                                                                                                                                                                                                       |
| Sour milk                                        | -                |                                                                                                                                                                                                                                                                                       |
| Yogurt                                           | Yogurt           |                                                                                                                                                                                                                                                                                       |
| Cheese                                           | Cheese           |                                                                                                                                                                                                                                                                                       |
| Cream                                            | -                |                                                                                                                                                                                                                                                                                       |
| Ice cream                                        | -                |                                                                                                                                                                                                                                                                                       |
| Butter                                           | Butter           |                                                                                                                                                                                                                                                                                       |
| <i>Larsson 2012<sup>10</sup></i>                 |                  |                                                                                                                                                                                                                                                                                       |
| Total dairy                                      | Total dairy      | Low-fat milk (0.5% fat), medium-fat milk (1.5%), full-fat milk (3% fat), milk in pancakes, low-fat sour milk/yogurt (0.5% fat), full-fat sour milk/yogurt (3% fat), cottage cheese (4% fat), low-fat cheese (10-17% fat), full-fat cheese (~28% fat), ice cream, cream, crème fraîche |
| Low-fat dairy                                    | Low-fat dairy    | Low-fat milk, medium-fat milk, low-fat sour milk/yogurt, medium-fat sour milk/yogurt, cottage cheese, low-fat cheese                                                                                                                                                                  |
| Full-fat dairy                                   | High-fat dairy   | Full-fat milk, full-fat sour milk/yogurt, full-fat cheese, ice cream, cream, crème fraîche                                                                                                                                                                                            |
| Milk                                             | Milk             | Low-fat milk, medium-fat milk, full-fat milk, milk in pancakes                                                                                                                                                                                                                        |
| Sour milk and yogurt                             | Fermented dairy* |                                                                                                                                                                                                                                                                                       |
| Cheese                                           | Cheese           | Low-fat cheese, full-fat cheese                                                                                                                                                                                                                                                       |
| Cream and crème fraîche                          | -                |                                                                                                                                                                                                                                                                                       |
| <i>Lin 2013<sup>11</sup></i>                     |                  |                                                                                                                                                                                                                                                                                       |
| Dairy                                            | Milk             | According to the authors, almost all dairy comprised milk                                                                                                                                                                                                                             |

|                                      |                  |                                                                                                                           |
|--------------------------------------|------------------|---------------------------------------------------------------------------------------------------------------------------|
| <i>Louie 2013<sup>12</sup></i>       |                  |                                                                                                                           |
| Total dairy                          | Total dairy      | All dairy foods                                                                                                           |
| Low-fat dairy                        | Low-fat dairy    | Reduced fat/skim milk, reduced fat dairy dessert, low-fat cheese                                                          |
| Whole-fat dairy                      | High-fat dairy   | Whole fat milk, whole fat cheese, medium fat dairy dessert                                                                |
| Ratio Low-fat dairy: whole fat dairy | -                |                                                                                                                           |
| <i>Misirli 2012<sup>13</sup></i>     |                  |                                                                                                                           |
| Dairy products                       | Total dairy      | Not further defined                                                                                                       |
| <i>Ness 2001<sup>14</sup></i>        |                  |                                                                                                                           |
| Milk                                 | Milk             | Not further defined                                                                                                       |
| <i>Pan (unpublished results)</i>     |                  |                                                                                                                           |
| Total dairy                          | Total dairy      | Not further defined                                                                                                       |
| Milk                                 | Milk             | Not further defined                                                                                                       |
| <i>Praagman 2015<sup>15</sup></i>    |                  |                                                                                                                           |
| Dairy products                       | Total dairy      | Milk, buttermilk, yogurt, coffee creamer, curd, pudding, porridge, custard, whipped cream, ice cream, cheese (not butter) |
| Low-fat dairy                        | Low-fat dairy    | Milk and milk products with a fat content of <2g/100g and cheese products with a fat content of <20g/100g                 |
| High-fat dairy                       | High-fat dairy   | Milk and milk products with a fat content of ≥2g/100g and cheese products with a fat content of ≥20g/100g                 |
| Total milk                           | Milk             | All types of dairy, excluding cheese                                                                                      |
| Fermented dairy                      | Fermented dairy  | All types of buttermilk, yogurt, curd, and cheese                                                                         |
| Cheese                               | Cheese           | All types of cheese, excluding curd                                                                                       |
| Yogurt                               | Yogurt           |                                                                                                                           |
| <i>Sauvagat 2003<sup>16</sup></i>    |                  |                                                                                                                           |
| Dairy products                       | -                | Butter, cheese                                                                                                            |
| Milk                                 | Milk             | Milk                                                                                                                      |
| <i>Sonestedt 2011<sup>17</sup></i>   |                  |                                                                                                                           |
| Total dairy                          | Total dairy      | Milk, cheese (>10% fat), cream, butter, milk-based spread Bregott                                                         |
| Milk                                 | Milk             | Non-fermented milk, fermented milk                                                                                        |
| Non-fermented milk                   | -                |                                                                                                                           |
| Fermented milk                       | Fermented dairy* | Yogurt, processed sour milk                                                                                               |
| Low-fat milk                         | Low-fat milk     | ≤2.4% fat                                                                                                                 |
| High-fat milk                        | High-fat milk    | >2.4% fat                                                                                                                 |
| Cheese                               | Cheese           | >10% fat                                                                                                                  |
| Butter                               | Butter           | Butter, milk-based spread Bregott                                                                                         |
| Cream                                | -                |                                                                                                                           |
| <i>Yaemsiri 2012<sup>18</sup></i>    |                  |                                                                                                                           |
| Total dairy                          | Total dairy      | Not further defined                                                                                                       |

\* Fermented milk includes cheese, yogurt and sour milk. We included studies that combined at least two of these products in our analysis of fermented dairy.

## References

1. Stroup DF, Berlin JA, Morton SC, Olkin I, Williamson GD, Rennie D, Moher D, Becker BJ, Sipe TA, Thacker SB. Meta-analysis of observational studies in epidemiology: a proposal for reporting. Meta-analysis Of Observational Studies in Epidemiology (MOOSE) group. *JAMA*. 2000;283:2008-2012.
2. Bernstein AM, Pan A, Rexrode KM, Stampfer M, Hu FB, Mozaffarian D, Willett WC. Dietary protein sources and the risk of stroke in men and women. *Stroke*. 2012;43:637-644.
3. Dalmeijer GW, Struijk EA, van der Schouw YT, Soedamah-Muthu SS, Verschuren WM, Boer JM, Geleijnse JM, Beulens JW. Dairy intake and coronary heart disease or stroke-A population-based cohort study. *Int J Cardiol*. 2012;167:925-929.
4. Elwood PC, Pickering JE, Fehily AM, Hughes J, Ness AR. Milk drinking, ischaemic heart disease and ischaemic stroke I. Evidence from the Caerphilly cohort. *Eur J Clin Nutr*. 2004;58:711-717.
5. Goldbohm RA, Chorus AM, Galindo Garre F, Schouten LJ, van den Brandt PA. Dairy consumption and 10-y total and cardiovascular mortality: a prospective cohort study in the Netherlands. *Am J Clin Nutr*. 2011;93:615-627.
6. Iso H, Stampfer MJ, Manson JE, Rexrode K, Hennekens CH, Colditz GA, Speizer FE, Willett WC. Prospective study of calcium, potassium, and magnesium intake and risk of stroke in women. *Stroke*. 1999;30:1772-1779.
7. Kinjo Y, Beral V, Akiba S, Key T, Mizuno S, Appleby P, Yamaguchi N, Watanabe S, Doll R. Possible protective effect of milk, meat and fish for cerebrovascular disease mortality in Japan. *J Epidemiol*. 1999;9:268-274.
8. Kondo I, Ojima T, Nakamura M, Hayasaka S, Hozawa A, Saitoh S, Ohnishi H, Akasaka H, Hayakawa T, Murakami Y, Okuda N, Miura K, Okayama A, Ueshima H, Group NDR. Consumption of dairy products and death from cardiovascular disease in the Japanese general population: the NIPPON DATA80. *J Epidemiol*. 2013;23:47-54.
9. Larsson SC, Mannisto S, Virtanen MJ, Kontto J, Albanes D, Virtamo J. Dairy foods and risk of stroke. *Epidemiology*. 2009;20:355-360.
10. Larsson SC, Virtamo J, Wolk A. Dairy consumption and risk of stroke in Swedish women and men. *Stroke*. 2012;43:1775-1780.
11. Lin PH, Yeh WT, Svetkey LP, Chuang SY, Chang YC, Wang C, Pan WH. Dietary intakes consistent with the DASH dietary pattern reduce blood pressure increase with age and risk for stroke in a Chinese population. *Asia Pac J Clin Nutr*. 2013;22:482-491.
12. Louie JC, Flood VM, Burlutsky G, Rangan AM, Gill TP, Mitchell P. Dairy consumption and the risk of 15-year cardiovascular disease mortality in a cohort of older Australians. *Nutrients*. 2013;5:441-454.
13. Misirli G, Benetou V, Lagiou P, Bamia C, Trichopoulos D, Trichopoulou A. Relation of the traditional Mediterranean diet to cerebrovascular disease in a Mediterranean population. *Am J Epidemiol*. 2012;176:1185-1192.
14. Ness AR, Smith GD, Hart C. Milk, coronary heart disease and mortality. *J Epidemiol Community Health*. 2001;55:379-382.
15. Praagman J, Franco OH, Ikram MA, Soedamah-Muthu SS, Engberink MF, van Rooij FJ, Hofman A, Geleijnse JM. Dairy products and the risk of stroke and coronary heart disease: the Rotterdam Study. *Eur J Nutr*. 2015;54:981-990.
16. Sauvaget C, Nagano J, Allen N, Grant EJ, Beral V. Intake of animal products and stroke mortality in the Hiroshima/Nagasaki Life Span Study. *Int J Epidemiol*. 2003;32:536-543.
17. Sonestedt E, Wirfalt E, Wallstrom P, Gullberg B, Orho-Melander M, Hedblad B. Dairy products and its association with incidence of cardiovascular disease: the Malmo diet and cancer cohort. *Eur J Epidemiol*. 2011;26:609-618.
18. Yaemsiri S, Sen S, Tinker L, Rosamond W, Wassertheil-Smoller S, He K. Trans fat, aspirin, and ischemic stroke in postmenopausal women. *Ann Neurol*. 2012;72:704-715.
